# Supplementary material for: Higher risk of severe hypoglycemia in children and adolescents with a rapid loss of C-peptide during the first 6 years after type 1 diabetes diagnosis
Source: HighWire-hosted journal article supplement (doi:10.1136/bmjdrc-2022-002991), 2022-11-01
Supplement: bmjdrc-2022-002991supp002_data_supplement.pdf [file bmjdrc-2022-002991supp002_data_supplement.pdf]

### Supplemental figure 1

Correlations between baseline BMI SDS and maximum C-peptide concentration (nmol/L) 3 months after diagnosis ( $p=0.002$ ) in 50 children and adolescents with type 1 diabetes. Body mass index standard deviation score (BMISDS).
